# Supplementary material for: Pilot Study on the Impact of Polymorphisms Linked to Multi-Kinase Inhibitor Metabolism on Lenvatinib Side Effects in Patients with Advanced Thyroid Cancer
Source: MDPI journal article supplement (doi:10.3390/ijms24065496), 2023-03-13
Supplement: s1 [file s1]

**Table S1.** Primer sequences and PCR conditions

| <b>Genes</b>  | <b>SNPs</b> | <b>Forward (5'-3')</b> | <b>Reverse (5'-3')</b> | <b>PCR conditions</b>                  |
|---------------|-------------|------------------------|------------------------|----------------------------------------|
| <i>CYP3A4</i> | rs2687116   | CTCCACTCAGCGTCTTG      | TGGTTGCATATGATGACAGGGT | 60°C fast,<br>1.5 mM MgCl <sub>2</sub> |
|               | rs2242480   | CTTAGGGATTTGAGGGCTTCA  | TTCTCCTGGGAAGTGGTGAG   | 60°C fast,<br>1.5 mM MgCl <sub>2</sub> |
| <i>ABCB1</i>  | rs2032582   | ATAGGTTCAGGCTTGCTGT    | ACTGGCTTTGCTACTTTCTGT  | 60°C fast,<br>1.5 mM MgCl <sub>2</sub> |
|               | rs1045642   | GTGTGCTGGTCCTGAAGTTG   | AAGGGTGTGATTTGGTTGCT   | 60°C fast,<br>1.5 mM MgCl <sub>2</sub> |
|               | rs2235048   | GTGTGCTGGTCCTGAAGTTG   | AAGGGTGTGATTTGGTTGCT   | 60°C fast,<br>1.5 mM MgCl <sub>2</sub> |
| <i>ABCG2</i>  | rs2231142   | GGCTTTGCAGACATCTATGGA  | CACATTACCTGGAGTCTGCC   | 60°C fast,<br>1.5 mM MgCl <sub>2</sub> |
| <i>CYP3A5</i> | rs776746    | TGGAGAGTGGCATAGGAGAT   | TGGATGCTTACCCTTCGATTTG | 60°C fast,<br>1.5 mM MgCl <sub>2</sub> |
